# Supplementary material
Source: PubMed Central journal article supplement (PMC4603652)
Supplement: NIHMS711355-supplement-Supplemental_Material.pdf [file NIHMS711355-supplement-Supplemental_Material.pdf]

## Supplementary Online Content

Ernst KF, Hall DE, Schmid KK, et al. Surgical palliative care consultations over time in relationship to system-wide frailty screening. *JAMA Surg*. Published online September 10, 2014. doi:10.1001/jamasurg.2014.1393.

### **eAppendix.** Risk analysis index

This supplementary material has been provided by the authors to give readers additional information about their work.

## eAppendix. Risk Analysis Index

Last Name \_\_\_\_\_ Last four SSN \_\_\_\_\_

Date this Form completed \_\_\_\_\_

Date of Surgery-Anticipated \_\_\_\_\_

Proposed Operation \_\_\_\_\_

**AGE, SEX, AND CANCER :**

1. Sex

Female = 0/ Male =

\_\_5\_\_

| 10A- Age and cancer Score | Score          | Score       |
|---------------------------|----------------|-------------|
| Age                       | without cancer | with cancer |
| < + 69                    | 2              | 20          |
| 70 – 74                   | 3              | 19          |
| 75 – 79                   | 4              | 18          |
| 80- 84                    | 5              | 17          |
| 85 – 89                   | 6              | 15          |
| 90 -94                    | 7              | 14          |
| 95 -99                    | 8              | 14          |
| 100+                      | 9              | 13          |

2.

Age \_\_\_\_\_

(Excluding skin cancer, except for melanoma)

Score with Cancer \_\_\_\_\_

OR

Score without cancer \_\_\_\_\_

**MEDICAL CO-MORBIDITIES:**

2. Have you had unintentional weight loss in the past 3 months (>10 lbs)?

No/Yes

\_\_5\_\_

3. Renal failure?

No/Yes \_\_6\_\_

4. Chronic/congestive heart failure?

No/Yes \_\_4\_\_

5. Poor appetite?

No/Yes \_\_4\_\_

6. Shortness of breath (at rest)?

No/Yes \_\_8\_\_

**COGNITION, RESIDENCE, AND ACTIVITY OF DAILY LIVING:**

Cognition and Activities of Daily Living:

7. Do you reside at a setting other than independent living? (listed below)

No/Yes\_8\_\_

If YES, circle answer: Skilled Nursing Facility/ Assisted Living/ Nursing Home

If YES, admission within in the past 3 months?

No/Yes

8. Have your cognitive skills or status deteriorated over the last 3 months?

No/Yes

9. Activities of Daily Living Chart:

Without cognitive decline

\_\_\_\_\_ (0-16)

With cognitive decline

\_\_\_\_\_ (-2 to 21)

**TOTAL SCORE**

\_\_\_\_\_

**PERCENT**

|                         |                         |                         |                         |
|-------------------------|-------------------------|-------------------------|-------------------------|
| Mobility/locomotion     | Eating                  | Toilet use              | Personal hygiene        |
| 0. Independent          | 0. Independent          | 0. Independent          | 0. Independent          |
| 1. Supervised           | 1. Supervised           | 1. Supervised           | 1. Supervised           |
| 2. Limited assistance   | 2. Limited assistance   | 2. Limited assistance   | 2. Limited assistance   |
| 3. Extensive assistance | 3. Extensive assistance | 3. Extensive assistance | 3. Extensive assistance |
| 4. Total dependence     | 4. Total dependence     | 4. Total dependence     | 4. Total dependence     |

INDEPENDENT = No help or oversight – OR – help or oversight provided only 1 or 2 times in last 7 days SUPERVISED = Oversight, supervision or cueing provided 3 or more times during the last 7 days.

LIMITED ASSISTANCE= patient *highly involved* in activity; but received physical help in guided maneuvering of limbs or other non weight bearing assistance 3 or more times in the last 7 days.

EXTENSIVE ASSISTANCE= while patient performed *part* of activity over last 7 day period, help was provided for the following: weight bearing support OR full staff performance during part of the past 7 days. TOTAL DEPENDENCE= full staff performance during the past 7 days.

TOTAL DEPENDENCE= full staff performance during the past 7 days.

| 12- ADL POINTS SCORE | ADL POINTS SCORE with COGNITIVE DECLINE |
|----------------------|-----------------------------------------|
| 0                    | ADL score -2                            |
| 1,2                  | ADL score -1                            |
| 3,4                  | ADL score 0                             |
| 5,6,7                | ADL score +1                            |
| 8,9                  | ADL score +2                            |
| 10,11                | ADL score +3                            |
| 12,13                | ADL score +4                            |
| 14,15,16             | ADL score +5                            |

| Points = percent | Points = percent | Points = percent |
|------------------|------------------|------------------|
| 0-5 = 4%         | 26 – 30 = 27%    | 56- 60 = 89%     |
| 6- 10 = 4%       | 31 – 35 = 36%    | 61 65 = 90%      |
| 11-15 = 7%       | 36 – 40 = 47%    | 66- 70 = 93%     |
| 16-20 = 11%      | 41 – 45 = 58%    | 71 -75 = 100 %   |
| 21- 25 = 17%     | 46- 50 = 69%     |                  |
